# Supplementary material
Source: publisher site journal article supplement (https://www.dovepress.com/article/281231)
Supplement: Supplementary file 1 [file get_supplementary_file.php]

Table S1. Checklist for items in STRICTA 2010

| **Item** | **Detail** | **Page number** |
| --- | --- | --- |
| **1. Acupuncture rationale** | 1a) Style of acupuncture (e.g. Traditional Chinese Medicine, Japanese, Korean, Western medical, Five Element, ear acupuncture, etc) | 3 |
| 1b) Reasoning for treatment provided, based on historical context, literature sources, and/or consensus methods, with references where appropriate | 3 |
| 1c) Extent to which treatment was varied | 3 |
| **2. Details of needling** | 2a) Number of needle insertions per subject per session (mean and range where relevant) | 3 |
| 2b) Names (or location if no standard name) of points used (uni/bilateral) | 3 |
| 2c) Depth of insertion, based on a specified unit of measurement, or on a particular tissue level | 3 |
| 2d) Response sought (e.g. *de qi* or muscle twitch response) | 3 |
| 2e) Needle stimulation (e.g. manual, electrical) | 3 |
| 2f) Needle retention time | 3 |
| 2g) Needle type (diameter, length, and manufacturer or material) | 3 |
| **3. Treatment regimen** | 3a) Number of treatment sessions | 3 |
| 3b) Frequency and duration of treatment sessions | 3 |
| **4. Other components of treatment** | 4a) Details of other interventions administered to the acupuncture group (e.g. moxibustion, cupping, herbs, exercises, lifestyle advice) | 3 |
| 4b) Setting and context of treatment, including instructions to practitioners, and information and explanations to patients | 3 |
| **5. Practitioner background** | 5) Description of participating acupuncturists (qualification or professional affiliation, years in acupuncture practice, other relevant experience) | 3 |
| **6. Control or comparator interventions** | 6a) Rationale for the control or comparator in the context of the research question, with sources that justify this choice | 3 |
| 6b) Precise description of the control or comparator. If sham acupuncture or any other type of acupuncture-like control is used, provide details as for Items 1 to 3 above. | 3 |

**Note:**MacPherson H, Altman DG, Hammerschlag R, Youping L, Taixiang W, White A, et al. (2010) Revised STandards for Reporting Interventions in Clinical Trials of Acupuncture (STRICTA): Extending the CONSORT Statement. PLoS Med 7(6): e1000261. <https://doi.org/10.1371/journal.pmed.1000261>. 1

**Table S2**. The results of subgroup analysis in ISI score

1. Subgroup analysis according to whether conventional medication for insomnia are taken

*taking conventional medication for insomnia

| ISI | Electroacupuncture (n=8) | | Sham (n=9) | | Usual care (n=8) | | *P* value (Electroacupuncture *versus* sham) | *P* value (Electroacupuncture *versus* usual care) |
| --- | --- | --- | --- | --- | --- | --- | --- | --- |
| Mean (95% CI) | *P* value  (within group) | Mean (95% CI) | *P* value  (within group) | Mean (95% CI) | *P* value  (within group) |
| Baseline | 17.38 (13.75, 21.00) |  | 19.78 (16.78, 22.77) |  | 17.25 (12.44, 22.06) |  |  |  |
| Week 2 | 14.25 (10.82, 17.68) | 0.0876 | 17.00 (12.76, 21.24) | 0.4114 | 15.14 (10.30, 19.99) | 0.3893 | 0.2278 | 0.7418 |
| Week 4 | 10.38 (6.61, 14.14) | **0.0005** | 14.88 (10.58, 19.17) | 0.1315 | 16.63 (12.97, 20.28) | 0.7361 | 0.1454 | **0.0041** |
| Week 8 | 10.50 (5.67, 15.33) | **0.0020** | 16.25 (11.46, 21.04) | 0.3029 | 15.88 (11.67, 20.08) | 0.4985 | 0.1226 | **0.0327** |
| Week 12 | 10.75 (4.59, 16.91) | **0.0126** | 15.50 (11.98, 19.02) | 0.1132 | 14.88 (10.42, 19.33) | 0.1486 | 0.3138 | 0.1175 |

Bold values mean statistical significance within-group or inter-group (*P*<.05). Week 4 was the end of treatment.

*not taking conventional medication for insomnia

| ISI | Electroacupuncture (n=41) | | Sham (n=43) | | Usual care (n=41) | | *P* value (Electroacupuncture *versus* sham) | *P* value (Electroacupuncture *versus* usual care) |
| --- | --- | --- | --- | --- | --- | --- | --- | --- |
| Mean (95% CI) | *P* value  (within group) | Mean (95% CI) | *P* value  (within group) | Mean (95% CI) | *P* value  (within group) |
| Baseline | 19.34 (18.02, 20.66) |  | 19.55 (18.28, 20.82) |  | 19.22 (17.76, 20.68) |  |  |  |
| Week 2 | 13.73 (12.35, 15.10) | **<.0001** | 13.85 (12.11, 15.58) | **<.0001** | 18.00 (16.42, 19.58) | 0.0798 | 0.8352 | **<.0001** |
| Week 4 | 10.08 (8.65, 11.50) | **<.0001** | 11.31 (9.53, 13.09) | **<.0001** | 16.63 (15.12, 18.15) | **0.0007** | 0.2200 | **<.0001** |
| Week 8 | 8.23 (6.74, 9.71) | **<.0001** | 10.26 (8.34, 12.17) | **<.0001** | 15.26 (13.79, 16.73) | **<.0001** | 0.0695 | **<.0001** |
| Week 12 | 7.48 (5.88, 9.07) | **<.0001** | 9.33 (7.49, 11.17) | **<.0001** | 14.57 (13.27, 15.87) | **<.0001** | 0.0993 | **<.0001** |

Bold values mean statistical significance within-group or inter-group (*P*<.05). Week 4 was the end of treatment.

1. Subgroup analysis according to the severity of insomnia by ISI score

*ISI score≥22

| ISI | Electroacupuncture (n=14) | | Sham (n=15) | | Usual care (n=15) | | *P* value (Electroacupuncture *versus* sham) | *P* value (Electroacupuncture *versus* usual care) |
| --- | --- | --- | --- | --- | --- | --- | --- | --- |
| Mean (95% CI) | *P* value  (within group) | Mean (95% CI) | *P* value  (within group) | Mean (95% CI) | *P* value  (within group) |
| Baseline | 24.00 (22.78, 25.22) |  | 24.13 (23.33, 24.94) |  | 24.20 (23.13, 25.27) |  |  |  |
| Week 2 | 16.15 (15.14, 17.17) | **<.0001** | 17.50 (14.41, 20.59) | **0.0004** | 21.20 (18.71, 23.69) | **0.0440** | 0.3967 | **0.0001** |
| Week 4 | 11.62 (8.79, 14.44) | **<.0001** | 13.71 (10.48, 16.94) | **<.0001** | 19.87 (17.94, 21.79) | **0.0007** | 0.2725 | **<.0001** |
| Week 8 | 9.92 (6.55, 13.30) | **<.0001** | 12.36 (9.25, 15.47) | **<.0001** | 18.67 (16.85, 20.49) | **<.0001** | 0.2088 | **<.0001** |
| Week 12 | 9.54 (5.52, 13.56) | **<.0001** | 12.43 (9.00, 15.86) | **<.0001** | 17.64 (16.06, 19.22) | **<.0001** | 0.2186 | **<.0001** |

Bold values mean statistical significance within-group or inter-group (*P*<.05). Week 4 was the end of treatment.

*ISI score<22

| ISI | Electroacupuncture (n=35) | | Sham (n=37) | | Usual care (n=34) | | *P* value (Electroacupuncture *versus* sham) | *P* value (Electroacupuncture *versus* usual care) |
| --- | --- | --- | --- | --- | --- | --- | --- | --- |
| Mean (95% CI) | *P* value  (within group) | Mean (95% CI) | *P* value  (within group) | Mean (95% CI) | *P* value  (within group) |
| Baseline | 17.03 (15.98, 18.08) |  | 17.59 (16.60, 18.57) |  | 16.56 (15.27, 17.85) |  |  |  |
| Week 2 | 12.94 (11.37, 14.51) | **<.0001** | 13.06 (11.32, 14.80) | **0.0002** | 15.73 (14.20, 17.26) | 0.4276 | 0.8817 | **0.0018** |
| Week 4 | 9.57 (8.11, 11.03) | **<.0001** | 11.15 (9.22, 13.08) | **<.0001** | 15.06 (13.54, 16.59) | 0.1361 | 0.1652 | **<.0001** |
| Week 8 | 8.11 (6.55, 9.68) | **<.0001** | 10.18 (8.48, 13.16) | **<.0001** | 13.77 (12.24, 15.31) | **0.0024** | 0.0561 | **<.0001** |
| Week 12 | 7.46 (5.73, 9.18) | **<.0001** | 9.52 (7.48, 11.55) | **<.0001** | 13.26 (11.81, 14.70) | **0.0012** | 0.0945 | **<.0001** |

Bold values mean statistical significance within-group or inter-group (*P*<.05). Week 4 was the end of treatment.

1. Subgroup analysis according to gender

*male

| ISI | Electroacupuncture (n=9) | | Sham (n=9) | | Usual care (n=19) | | *P* value (Electroacupuncture *versus* sham) | *P* value (Electroacupuncture *versus* usual care) |
| --- | --- | --- | --- | --- | --- | --- | --- | --- |
| Mean (95% CI) | *P* value  (within group) | Mean (95% CI) | *P* value  (within group) | Mean (95% CI) | *P* value  (within group) |
| Baseline | 17.78 (14.57, 20.99) |  | 19.44 (15.95, 21.94) |  | 19.37 (17.56, 21.17) |  |  |  |
| Week 2 | 13.50 (8.94, 18.06) | 0.0592 | 14.38 (9.82, 18.93) | **0.0092** | 17.53 (15.00, 20.06) | 0.1670 | 0.7201 | 0.1518 |
| Week 4 | 9.63 (5.46, 13.79) | **0.0012** | 12.88 (7.54, 18.21) | **0.0159** | 17.65 (15.32, 19.97) | 0.0557 | 0.5311 | **0.0002** |
| Week 8 | 8.63 (3.32, 13.93) | **0.0017** | 14.00 (8.58, 19.42) | **0.0272** | 15.88 (13.76, 18.00) | **0.0013** | 0.2070 | **0.0023** |
| Week 12 | 8.38 (2.74, 14.01) | **0.0028** | 12.00 (6.47, 17.53) | **0.0067** | 14.88 (12.92, 16.83) | **<.0001** | 0.5380 | **0.0041** |

Bold values mean statistical significance within-group or inter-group (*P*<.05). Week 4 was the end of treatment.

*female

| ISI | Electroacupuncture (n=40) | | Sham (n=43) | | Usual care (n=30) | | *P* value (Electroacupuncture *versus* sham) | *P* value (Electroacupuncture *versus* usual care) |
| --- | --- | --- | --- | --- | --- | --- | --- | --- |
| Mean (95% CI) | *P* value  (within group) | Mean (95% CI) | *P* value  (within group) | Mean (95% CI) | *P* value  (within group) |
| Baseline | 19.30 (17.94, 20.66) |  | 19.63 (18.32, 20.93) |  | 18.60 (16.57, 20.63) |  |  |  |
| Week 2 | 13.88 (12.59, 15.16) | **<.0001** | 14.38 (12.62, 16.15) | **<.0001** | 17.57 (15.62, 19.52) | 0.1777 | 0.5776 | **<.0001** |
| Week 4 | 10.23 (8.83, 11.62) | **<.0001** | 11.72 (9.96, 13.48) | **<.0001** | 16.03 (14.33, 17.74) | **0.0106** | 0.1456 | **<.0001** |
| Week 8 | 8.60 (7.12, 10.08) | **<.0001** | 10.72 (8.73, 12.70) | **<.0001** | 15.07 (13.25, 16.89) | **0.0002** | 0.0706 | **<.0001** |
| Week 12 | 7.95 (6.25, 9.65) | **<.0001** | 10.05 (8.18, 11.92) | **<.0001** | 14.48 (12.80, 16.16) | **0.0002** | 0.0782 | **<.0001** |

Bold values mean statistical significance within-group or inter-group (*P*<.05). Week 4 was the end of treatment.

**Table S3**. The result of per-protocol analysis in ISI score

| ISI | Electroacupuncture (n=46) | | Sham (n=45) | | Usual care (n=45) | | *P* value (Electroacupuncture *versus* sham) | *P* value (Electroacupuncture *versus* usual care) |
| --- | --- | --- | --- | --- | --- | --- | --- | --- |
| Mean (95% CI) | *P* value  (within group) | Mean (95% CI) | *P* value  (within group) | Mean (95% CI) | *P* value  (within group) |
| Baseline | 18.89 (17.61, 20.18) |  | 19.31 (18.12, 20.50) |  | 18.69 (17.22, 20.16) |  |  |  |
| Week 2 | 13.61 (12.38, 14.84) | **<.0001** | 14.20 (12.57, 15.83) | **<.0001** | 17.41 (15.92, 18.89) | 0.0568 | 0.6641 | **<.0001** |
| Week 4 | 10.13 (8.81, 11.45) | **<.0001** | 11.80 (10.13, 13.47) | **<.0001** | 16.51 (15.16, 17.86) | **0.0020** | 0.1341 | **<.0001** |
| Week 8 | 8.57 (7.12, 10.01) | **<.0001** | 10.98 (9.11, 12.84) | **<.0001** | 15.11 (13.85, 16.38) | **<.0001** | **0.0483** | **<.0001** |
| Week 12 | 7.96 (6.30, 9.61) | **<.0001** | 10.04 (8.30, 11.78) | **<.0001** | 14.62 (13.38, 15.86) | **<.0001** | 0.0930 | **<.0001** |

Bold values mean statistical significance within-group or inter-group (*P*<.05). Week 4 was the end of treatment.

**Table S4**. The results of laboratory tests

| Lab | Electroacupuncture | Sham | Usual care |
| --- | --- | --- | --- |
| AST |  |  |  |
| Baseline | 24.39 (22.14, 26.64) | 24.06 (21.95, 26.17) | 25.54 (23.14, 27.95) |
| Week 4 | 22.88 (21.04, 24.71) | 24.91 (21.74, 28.09) | 26.83 (20.58, 33.07) |
| Difference | -1.40 (-3.70, 0.91) | 0.55 (-1.45, 2.56) | 1.20 (-4.51, 6.91) |
| *P* value | 0.2292 | 0.5814 | 0.6739 |
| ALT |  |  |  |
| Baseline | 20.45 (17.34, 23.56) | 20.98 (17.23, 24.73) | 21.90 (18.63, 25.16) |
| Week 4 | 19.77 (16.81, 22.74) | 22.83 (16.43, 29.23) | 23.65 (15.97, 31.34) |
| Difference | -0.27 (-2.37, 1.84) | 1.64 (-2.17, 5.45) | 1.76 (-5.19, 8.70) |
| *P* value | 0.7971 | 0.3912 |  |
| Total bilirubin |  |  |  |
| Baseline | 0.64 (0.57, 0.72) | 0.66 (0.60, 0.72) | 0.71 (0.61, 0.80) |
| Week 4 | 0.65 (0.58, 0.72) | 0.64 (0.57, 0.71) | 0.73 (0.64, 0.82) |
| Difference | 0.01 (-0.04, 0.07) | -0.02 (-0.07, 0.04) | 0.03 (-0.04, 0.09) |
| *P* value | 0.6369 | 0.5611 | 0.4477 |
| Albumin |  |  |  |
| Baseline | 5.09 (3.55, 6.64) | 4.31 (4.23, 4.39) | 5.05 (3.55, 6.54) |
| Week 4 | 4.28 (4.21, 4.34) | 4.32 (4.25, 4.39) | 4.27 (4.11, 4.42) |
| Difference | -0.84 (-2.42, 0.75) | 0.03 (-0.04, 0.11) | -0.84 (-2.45, 0.77) |
| *P* value | 0.2952 | 0.3993 | 0.2985 |
| BUN |  |  |  |
| Baseline | 14.92 (13.78, 16.07) | 14.25 (13.25, 15.24) | 14.45 (13.23, 15.68) |
| Week 4 | 15.03 (13.82, 16.24) | 15.12 (13.96, 16.28) | 14.82 (13.52, 16.12) |
| Difference | 0.16 (-1.03, 1.35) | 0.73 (-0.08, 1.55) | 0.41 (-0.63, 1.44) |
| *P* value | 0.7898 | 0.4279 | 0.4299 |
| Creatinine |  |  |  |
| Baseline | 0.84 (0.79, 0.89) | 0.81 (0.77, 0.85) | 0.86 (0.81, 0.91) |
| Week 4 | 0.86 (0.81, 0.91) | 0.82 (0.78, 0.86) | 0.87 (0.82, 0.91) |
| Difference | 0.03 (0.00, 0.06) | 0.01 (-0.02, 0.03) | 0.00 (-0.03, 0.03) |
| *P* value | 0.0323 | 0.5558 | 0.9756 |
| TSH |  |  |  |
| Baseline | 2.03 (1.75, 2.31) | 2.04 (1.70, 2.38) | 1.92 (1.44, 2.41) |
| Week 4 | 2.23 (1.87, 2.58) | 2.24 (1.92, 2.56) | 2.74 (1.17, 4.32) |
| Difference | 0.19 (-0.08, 0.46) | 0.11 (-0.10, 0.32) | 0.82 (-0.48, 2.12) |
| *P* value | 0.168 | 0.289 | 0.2084 |
| Free T4 |  |  |  |
| Baseline | 1.19 (1.14, 1.23) | 1.17 (1.13, 1.22) | 1.20 (1.15, 1.26) |
| Week 4 | 1.15 (1.11, 1.19) | 1.15 (1.10, 1.19) | 1.20 (1.15, 1.26) |
| Difference | -0.03 (-0.08, 0.02) | -0.02 (-0.06, 0.02) | 0.00 (-0.05, 0.05) |
| *P* value | 0.197 | 0.3306 | 0.9153 |
| RBC |  |  |  |
| Baseline | 440.94 (429.42, 452.46) | 442.02 (429.12, 454.92) | 450.40 (435.52, 465.27) |
| Week 4 | 437.94 (426.76, 449.12) | 430.72 (420.81, 440.64) | 447.98 (432.80, 463.16) |
| Difference | -2.25 (-8.34, 3.84) | -7.40 (-17.57, 2.76) | -1.16 (-7.14, 4.83) |
| *P* value | 0.4607 | 0.1492 | 0.6989 |
| WBC |  |  |  |
| Baseline | 61.21 (56.54, 65.89) | 58.10 (52.30, 63.89) | 61.76 (56.84, 66.68) |
| Week 4 | 63.43 (56.90, 69.96) | 55.83 (52.02, 59.64) | 59.88 (55.44, 64.32) |
| Difference | 1.77 (-4.14, 7.68) | -0.96 (-5.53, 3.62) | -2.11 (-6.37, 2.16) |
| *P* value | 0.5491 | 0.6764 | 0.3251 |
| Neutrophil |  |  |  |
| Baseline | 56.88 (54.58, 59.19) | 55.69 (53.26, 58.12) | 58.54 (56.07, 61.01) |
| Week 4 | 57.95 (55.15, 60.75) | 56.33 (53.51, 59.15) | 56.99 (53.80, 60.18) |
| Difference | 0.87 (-1.73, 3.48) | 0.48 (-1.69, 2.65) | -1.46 (-4.30, 1.39) |
| *P* value | 0.5033 | 0.658 | 0.3075 |
| Monocyte |  |  |  |
| Baseline | 6.65 (5.96, 7.33) | 6.23 (5.64, 6.82) | 7.55 (6.63, 8.47) |
| Week 4 | 6.48 (5.89, 7.07) | 6.35 (5.68, 7.01) | 6.79 (6.09, 7.49) |
| Difference | -0.08 (-0.61, 0.46) | 0.02 (-0.49, 0.52) | -0.66 (-1.35, 0.04) |
| *P* value | 0.7743 | 0.9464 | 0.0626 |
| Lymphocyte |  |  |  |
| Baseline | 34.14 (32.18, 36.10) | 34.67 (32.32, 37.01) | 31.31 (29.25, 33.36) |
| Week 4 | 33.27 (30.67, 35.87) | 34.71 (32.30, 37.13) | 33.44 (30.56, 36.33) |
| Difference | -0.81 (-3.04, 1.43) | 0.48 (-2.04, 2.99) | 1.89 (-0.45, 4.22) |
| *P* value | 0.4713 | 0.7043 | 0.1106 |
| Hemoglobin |  |  |  |
| Baseline | 13.64 (13.33, 13.96) | 13.37 (13.06, 13.67) | 13.95 (13.50, 14.39) |
| Week 4 | 13.55 (13.25, 13.84) | 13.25 (12.93, 13.56) | 16.27 (11.65, 20.89) |
| Difference | -0.06 (-0.24, 0.11) | -0.03 (-0.20, 0.14) | 2.39 (-2.40, 7.18) |
| *P* value | 0.4618 | 0.7296 | 0.3206 |
| Hematocrit |  |  |  |
| Baseline | 40.40 (39.49, 41.31) | 39.58 (38.73, 40.42) | 41.03 (39.80, 42.26) |
| Week 4 | 40.35 (39.47, 41.24) | 39.30 (38.40, 40.20) | 40.99 (39.73, 42.25) |
| Difference | 0.05 (-0.47, 0.58) | -0.06 (-0.52, 0.40) | -0.02 (-0.57, 0.54) |
| *P* value | 0.8431 | 0.7954 | 0.9551 |
| Platelet |  |  |  |
| Baseline | 23.98 (22.44, 25.52) | 23.89 (22.45, 25.33) | 24.31 (22.80, 25.83) |
| Week 4 | 24.69 (23.10, 26.28) | 23.67 (22.08, 25.25) | 24.45 (22.85, 26.05) |
| Difference | 0.58 (-0.51, 1.66) | -0.14 (-1.01, 0.73) | -0.20 (-0.98, 0.58) |
| *P* value | 0.2909 | 0.7465 | 0.6160 |
| ESR |  |  |  |
| Baseline | 18.04 (14.24, 21.85) | 17.65 (14.43, 20.88) | 15.60 (11.32, 19.89) |
| Week 4 | 16.94 (13.78, 20.09) | 16.60 (13.73, 19.46) | 17.93 (13.41, 22.46) |
| Difference | -1.10 (-3.29, 1.09) | -0.81 (-3.53, 1.91) | 1.98 (-1.74, 5.70) |
| *P* value | 0.3163 | 0.5528 | 0.2896 |

**Table S5**. The results of blinding test

| Week 1 | Electroacupuncture | Sham |
| --- | --- | --- |
| Real electroacupuncture | 36 | 31 |
| Sham-electroacupuncture | 6 | 8 |
| Don’t know | 7 | 9 |
| New Blind Index | 0.612 (0.418, 0.807) | -0.479 (-0.695, -0.263) |

| Week 4 | Electroacupuncture | Sham |
| --- | --- | --- |
| Real electroacupuncture | 36 | 27 |
| Sham-electroacupuncture | 5 | 15 |
| Don’t know | 7 | 5 |
| New Blind Index | 0.646 (0.459, 0.833) | -0.255 (-0.516, 0.005) |

**Table S6**. The results of variables related to insomnia analyzed using gender as a covariate

| ISI | Mean difference(95% CI) *(*Electroacupuncture *versus* sham) | *P* value | Mean difference(95% CI) *(*Electroacupuncture *versus* usual care) | *P* value |
| --- | --- | --- | --- | --- |
| Week 2 | -0.43 (-2.22, 1.37) | 0.6410 | -1.81 (-2.63, -0.99) | **<.0001** |
| Week 4 | -1.71 (-3.67, 0.25) | 0.0875 | -3.15 (-4.01, -2.30) | **<.0001** |
| Week 8 | -2.57 (-4.75, -0.40) | **0.0206** | -3.35 (-4.26, -2.44) | **<.0001** |
| Week 12 | -2.28 (-4.51, -0.06) | **0.0440** | -3.30 (-4.29, -2.31) | **<.0001** |

| PSQI | Mean difference(95% CI) *(*Electroacupuncture *versus* sham) | *P* value | Mean difference(95% CI) *(*Electroacupuncture *versus* usual care) | *P* value |
| --- | --- | --- | --- | --- |
| Week 2 | -0.43 (-1.53, 0.67) | 0.4474 | -0.68 (-1.21, -0.16) | **0.0107** |
| Week 4 | -0.37 (-1.45, 0.72) | 0.5074 | -1.30 (-1.82, -0.77) | **<.0001** |
| Week 8 | -0.71 (-1.88, 0.46) | 0.2357 | -1.38 (-1.94, -0.81) | **<.0001** |
| Week 12 | -0.47 (-1.74, 0.81) | 0.4716 | -1.42 (-2.05. -0.79) | **<.0001** |

| Sleep diary (sleep onset latency, min) | Mean difference(95% CI) *(*Electroacupuncture *versus* sham) | *P* value | Mean difference(95% CI) *(*Electroacupuncture *versus* usual care) | *P* value |
| --- | --- | --- | --- | --- |
| Week 2 | -6.04 (-17.26, 5.18) | 0.2916 | -5.43 (-10.92, 0.05) | 0.0522 |
| Week 4 | -2.54 (-12.81, 7.73) | 0.6278 | -6.41 (-11.39, -1.44) | **0.0115** |
| Week 8 | -3.33 (-15.05, 8.38) | 0.5770 | -6.51 (-12.03, -0.99) | **0.0209** |
| Week 12 | -3.43 (-12.38, 5.51) | 0.4518 | -5.65 (-10.27, -1.03) | **0.0165** |

| Sleep diary  (waking after sleep onset, number) | Mean difference(95% CI) *(*Electroacupuncture *versus* sham) | *P* value | Mean difference(95% CI) *(*Electroacupuncture *versus* usual care) | *P* value |
| --- | --- | --- | --- | --- |
| Week 2 | -0.02 (-0.29, 0.25) | 0.8842 | -0.16 (-0.30, -0.02) | **0.0273** |
| Week 4 | -0.09 (-0.37, 0.19) | 0.5160 | -0.14 (-0.28, 0.00) | 0.0579 |
| Week 8 | -0.18 (-0.55. 0.19) | 0.3345 | -0.16 (-0.32, -0.01) | **0.0384** |
| Week 12 | -0.29 (-0.61, 0.03) | 0.0764 | -0.24 (-0.46, -0.03) | **0.0247** |

| Sleep diary (total sleep time, min) | Mean difference(95% CI) *(*Electroacupuncture *versus* sham) | *P* value | Mean difference(95% CI) *(*Electroacupuncture *versus* usual care) | *P* value |
| --- | --- | --- | --- | --- |
| Week 2 | 1.9 (-17.3, 21.0) | 0.8488 | 14.2 (5.6, 23.9) | **0.0039** |
| Week 4 | 1.9 (-18.8, 22.5) | 0.8606 | 16.9 (7.0, 26.7) | **0.0008** |
| Week 8 | 7.2 (-13.9, 28.3) | 0.5040 | 17.2 (6.6, 27.8) | **0.0014** |
| Week 12 | 2.4 (-22.0, 26.8) | 0.8448 | 13.0 (1.3, 24.8) | **0.0301** |

| Sleep diary (sleep efficiency, %) | Mean difference(95% CI) *(*Electroacupuncture *versus* sham) | *P* value | Mean difference(95% CI) *(*Electroacupuncture *versus* usual care) | *P* value |
| --- | --- | --- | --- | --- |
| Week 2 | 0.020 (-0.024, 0.065) | 0.3703 | 0.017 (-0.006, 0.040) | 0.1585 |
| Week 4 | 0.044 (0.002, 0.086) | **0.0405** | 0.035 (0.015, 0.054) | **0.0005** |
| Week 8 | 0.032 (-0.007, 0.070) | 0.1044 | 0.038 (0.018, 0.058) | **0.0002** |
| Week 12 | 0.032 (-0.008, 0.072) | 0.1167 | 0.023 (0.004, 0.042) | **0.0190** |

Bold values mean statistical significance within-group or inter-group (*P*<.05). Week 4 was the end of treatment.

References

1. MacPherson H, Altman DG, Hammerschlag R, Youping L, Taixiang W, White A, et al. (2010) Revised STandards for Reporting Interventions in Clinical Trials of Acupuncture (STRICTA): Extending the CONSORT Statement. PLoS Med 7(6): e1000261. <https://doi.org/10.1371/journal.pmed.1000261>
